# Supplementary material for: Anion-induced morphological regulation of cupric oxide nanostructures and their application as co-catalysts for solar water splitting
Source: Royal Society of Chemistry journal article supplement (doi:10.1039/c9dt04626g), 2020-01-01
Supplement: c9dt04626g1.pdf [file c9dt04626g1.pdf]

## SUPPORTING INFORMATION

### **Anion-Induced Morphological Regulation of Cupric Oxide Nanostructures and Their Application as Co-catalyst for Solar Water Splitting**

*Truong-Giang Vo<sup>1</sup>, Shu-Ju Chang<sup>1</sup>, Chia-Ying Chiang<sup>1\*</sup>*

*<sup>1</sup> Department of Chemical Engineering, National Taiwan University of Science and Technology,  
Taipei-106, Taiwan*

\*Corresponding Authors:

Prof. **Chia-Ying Chiang**

Phone: +886-2-2737-6641

Fax: +886-2-2737-6641

E-mail: [cychiang@mail.ntust.edu.tw](mailto:cychiang@mail.ntust.edu.tw)

## Reagents and materials

All chemicals used in this study had reagent-grade purity. Copper (II) nitrate, sodium nitrate, *p*-benzoquinone, sodium hydroxide was purchased from Acros Organics. All solutions were prepared using deionized water. Fluorine doped tin oxide (FTO) coated glass plate (15  $\Omega$ /sq) of thickness 2.2 mm was used as the substrate.

## Fabrication of BiVO<sub>4</sub> Photoelectrodes

In a typical deposition, 32 mM Bi(NO<sub>3</sub>)<sub>3</sub> and 48 mM vanadium (IV)-oxyacetylacetonate was dissolved in a mixture of acetylacetone and acetic acid (8.25:1, v/v). The dark green solution was sonicated for 20 min, then was filtered with 0.22  $\mu$ m nylon filters before being dispensed onto fluorine-doped tin oxide (FTO) glass. The spin coating of the precursor solution onto FTO was conducted with the speed of 2500 rpm for 20 s for a single layer coating, and the calcination in the air was followed. For the first three layers, the sample was annealed at 500 °C for 10 min in a muffle furnace. From layer 4 to 6, the sample was maintained at 500 °C for 2 h. After the last spin-coating cycle, the substrate was annealed for 4 h at 500 °C to ensure a better crystallinity of BiVO<sub>4</sub>. During the period of temperature elevation to 500 °C, the heating rate was set at 3 °C/min.

It can be found that the characteristic peaks of Cu-LHS/S has shifted to lower  $2\theta$  values compared Cu-LHS/N, revealing the increasing in crystal layer spacing of Cu-LHS/S in order to accommodate the  $\text{SO}_4^{2-}$  which is bigger in size

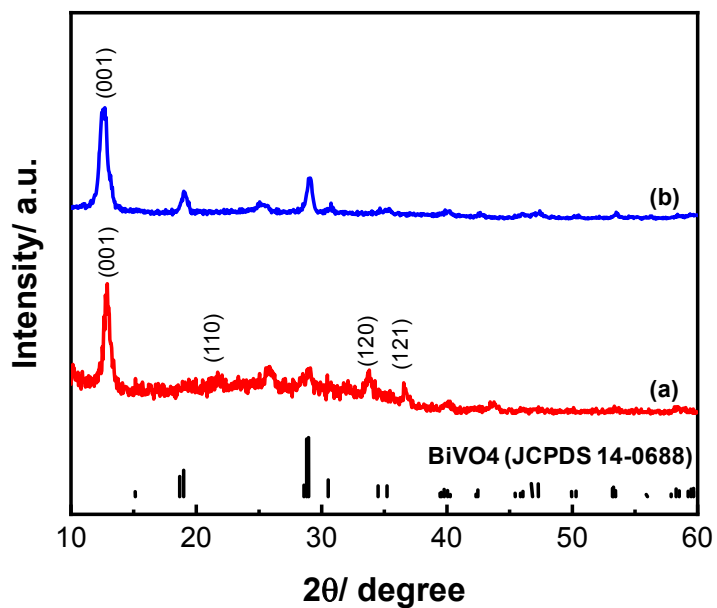

**Figure S1** XRD patterns of as-deposited (a) Cu-LHS/N corresponding to  $(\text{Cu}_2\text{NO}_3(\text{OH})_3)$ , (b) Cu-LHS/S corresponding to  $(\text{Cu}_4\text{SO}_4(\text{OH})_6)$ .

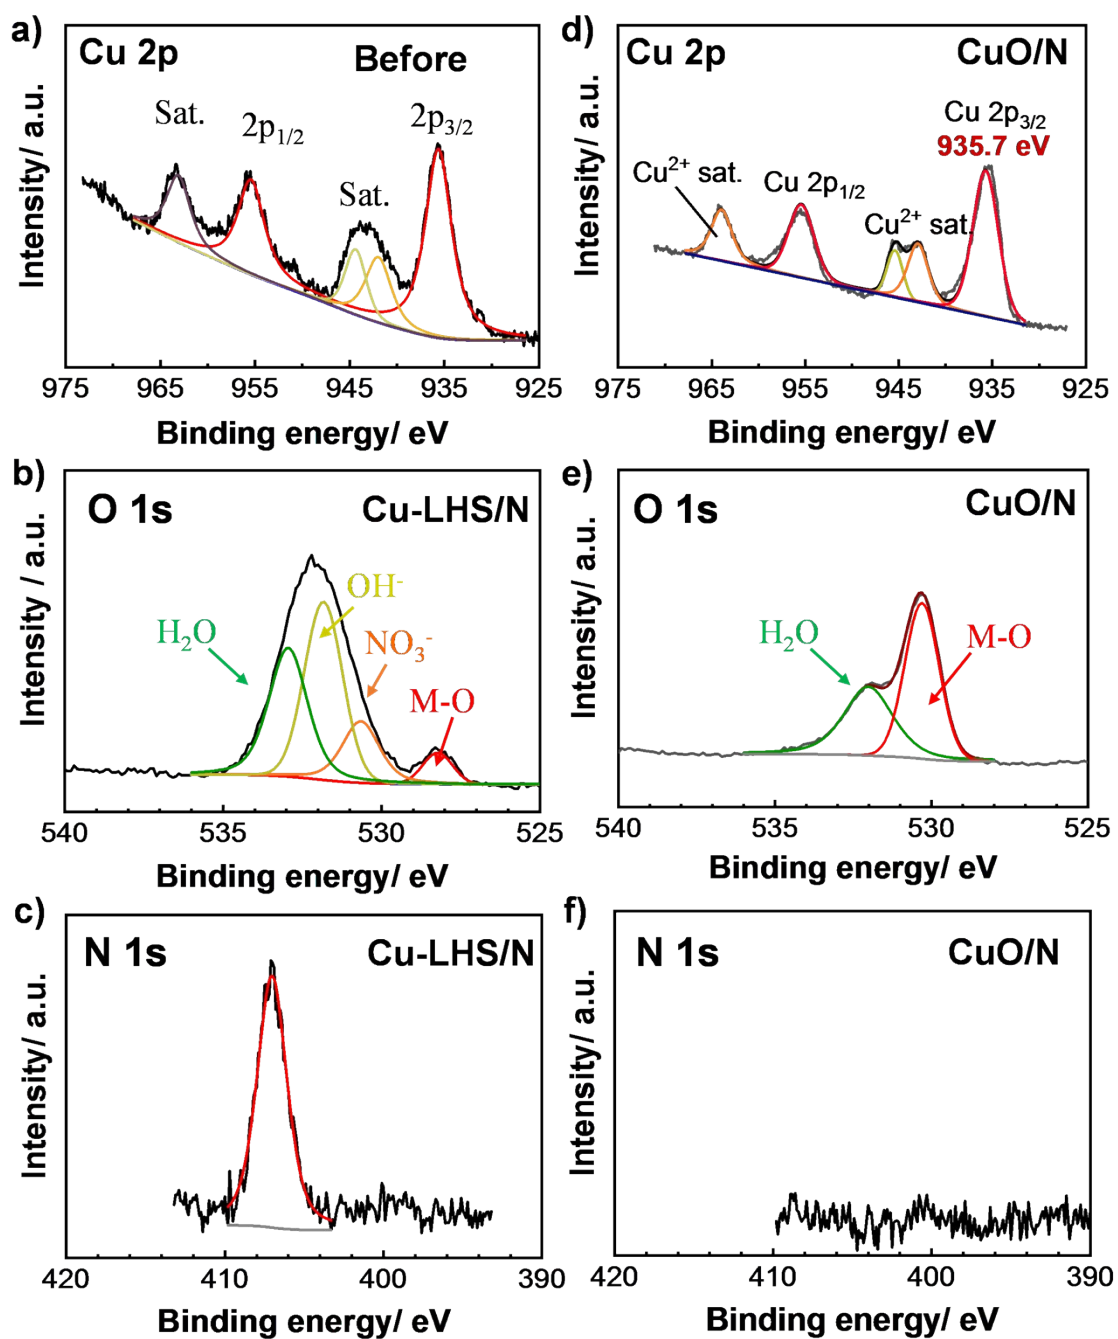

Figure S2 HR-XPS spectra of Cu 2p, O 1s, N 1s for Cu-LHS/N (a-c) and CuO-N (d-f).

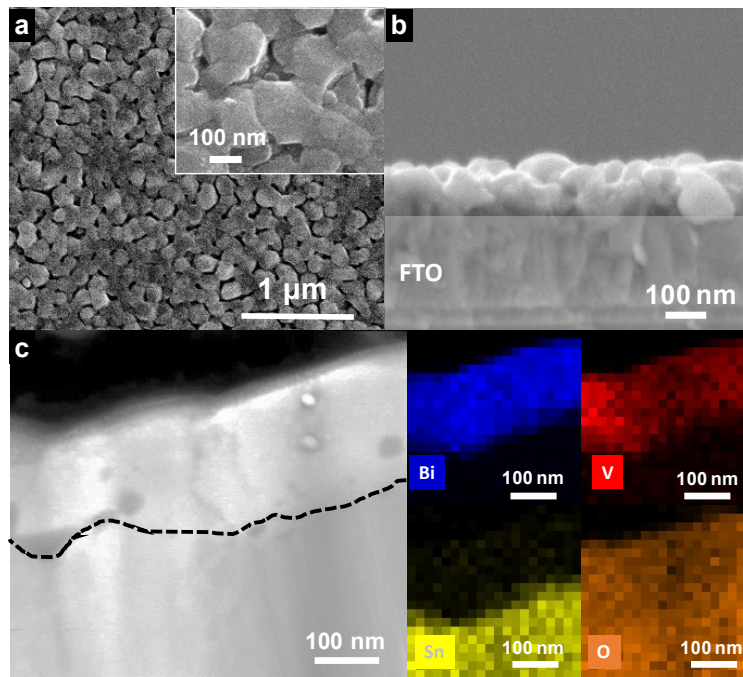

**Figure S3** (a) Top-view, (b) side-view of BVO thin film substrate and (c) STEM-HAADF image and elemental maps images of Bi (blue), V (red), Sn (yellow) and O (orange).

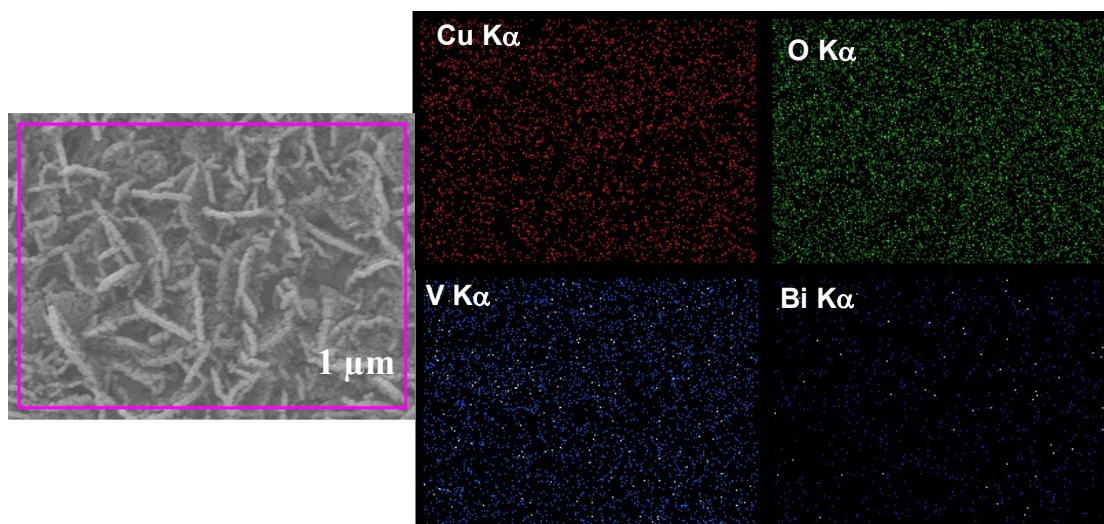

**Figure S4** Electron images and elemental maps images of Bi (violet), V (blue), Cu (red) and O (green) for BVO/CuO-N sample.

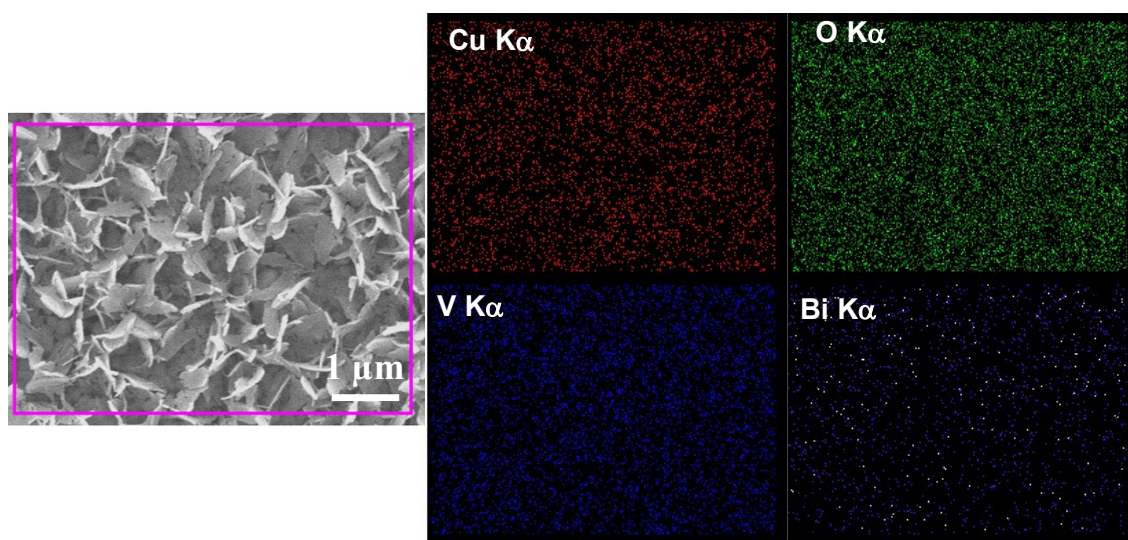

**Figure S5** Electron images and elemental maps images of Bi (violet), V (blue), Cu (red) and O (green) for BVO/CuO-S sample.

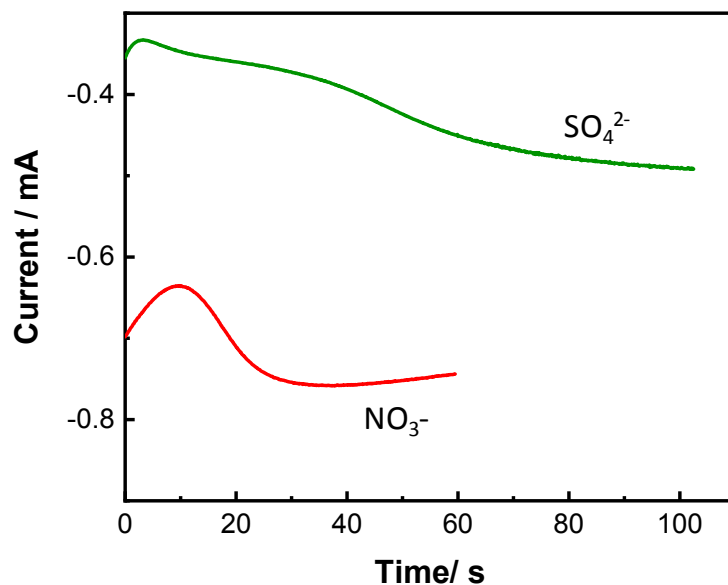

**Figure S6** Change in current density during potentiostatic electrodeposition at 0 V vs. Ag/AgCl from solutions containing sulfate or nitrate ions as counter anions

The electrochemical behaviors of the as-made CuO/FTO for the OER are evaluated in 0.1M NaOH solution, of which the detailed results are demonstrated Figure S7. Obviously, both CuO-S and CuO-N samples did show OER catalytic activity in basic solution although its performance is much less inferior to other reports where highly porous and conductive substrates, e.g. Ni foam, was used.

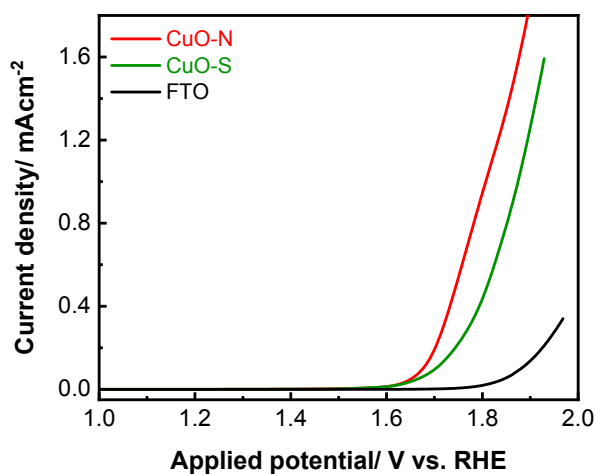

**Figure S7** LSV of CuO-N and CuO-S for oxygen evolution reaction in 0.1M NaOH (pH 13)

The electrochemical active surface area of the catalysts was estimated based on the double-layer capacitance ( $C_{dl}$ ) of the catalysts. Cyclic voltammetry (CV) in a potential window where no Faradaic processes took place was used to test the catalysts under different scan rates. The  $C_{dl}$  can be estimated by the slope of a linear fitting for the current density vs. scan rate plot.

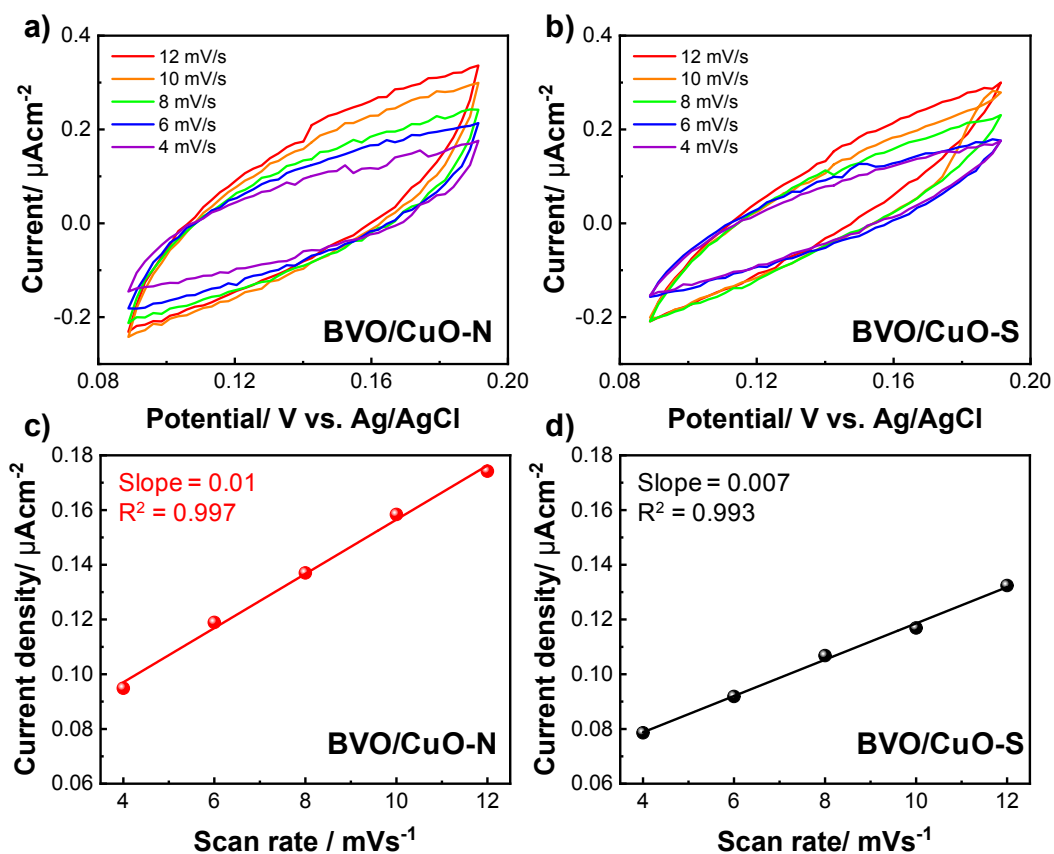

**Figure S8** (a, b) CV scans near the open circuit potential (OCP) and (c, d) current densities at 0.14 V vs. RHE plotted against scan rate for BVO/CuO-N and BVO/CuO-S.



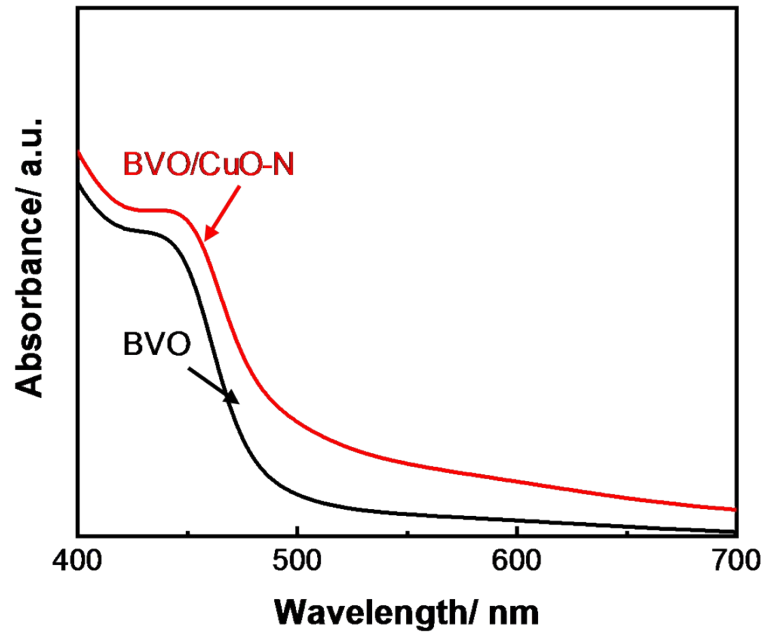

**Figure S9** UV-Vis absorption of BVO and BVO/CuO-N photoanode.

In order to investigate the recombination kinetics of photogenerated charge carriers, time-resolved photoluminescence (TRPL) measurements were performed on bare BVO and BVO/CuO-N with 405 nm laser excitation, and the emission intensity was monitored at 530 nm. The PL decay profiles are fitted using a biexponential decay function expressed as follows<sup>1,2</sup>:

$$I(t) = A_1 \exp(t/\tau_1) + A_2 \exp(t/\tau_2)$$

The average excited state lifetime can be calculated by using the following relationship<sup>3,4</sup>

$$\tau_{avg} = \frac{\sum_{i=1}^2 A_i \tau_i^2}{\sum_{i=1}^2 A_i \tau_i}$$

Where  $\tau_i$  is the lifetime of individual component and  $A_i$  is the corresponding amplitude.

For both BVO and BVO/CuO-N, the TRPL decay curves could be fit with a biexponential decay pattern, where the fast component ( $\tau_1$ ) most likely corresponds to the electron trapping at defects and the slow one ( $\tau_2$ ) is owing to the electron-hole recombination<sup>2,5</sup>. The details of the time constants ( $\tau_i$ ) and amplitudes ( $A_i$ ) of bare BVO and BVO/CuO-N are tabulated in **Table S1**.

**Table S1** Results of time-resolved PL data of the BVO and BVO/CuO-N

| Sample  | $\tau_1$ (ps) | $A_1$ | $\tau_2$ (ps) | $A_2$ | $\tau_{avg}$ (ps) |
|---------|---------------|-------|---------------|-------|-------------------|
| BVO     | 84.5          | 0.977 | 783.7         | 0.023 | 209.8             |
| BVO/CuO | 67.1          | 0.987 | 817.7         | 0.013 | 170.9             |

- 1 S. Nayak, L. Mohapatra and K. Parida, *J. Mater. Chem. A*, 2015, **3**, 18622–18635.
- 2 J. Nong, G. Lan, W. Jin, P. Luo, C. Guo, X. Tang, Z. Zang and W. Wei, *J. Mater. Chem. C*, 2019, **7**, 9830–9839.
- 3 Z. Lin, C. Du, B. Yan and G. Yang, *Catal. Sci. Technol.*, 2019, **9**, 5582–5592.
- 4 T. Xie, Y. Liu, H. Wang and Z. Wu, *Sci. Rep.*, 2019, **9**, 7551.
- 5 K. Zhang, B. Jin, C. Park, Y. Cho, X. Song, X. Shi, S. Zhang, W. Kim, H. Zeng and J. H. Park, *Nat. Commun.*, 2019, **10**, 2001.



## Flate-band estimation by Mott-Schottky measurement

The conduction band (CB) of an n-type semiconductor or the valence band (VB) of a p-type semiconductor can also be measured by PEC through Mott-Schottky plot.

For an n-type semiconductor:

$$\frac{1}{C^2} = \frac{2}{\epsilon\epsilon_0 A^2 N_D} \left( V - V_{FB} - \frac{k_B T}{e} \right)$$

whereas for a p-type semiconductor:

$$\frac{1}{C^2} = \frac{2}{\epsilon\epsilon_0 A^2 N_A} \left( V_{FB} - V - \frac{k_B T}{e} \right)$$

where  $C$  (F) is the space-charge capacitance;  $A$  ( $\text{cm}^2$ ) is the active geometric area;  $N_D$  ( $\text{cm}^{-3}$ ) is the donor density;  $e$  is the electronic charge;  $\epsilon$  is the dielectric constant of the semiconductor;  $\epsilon_0$  is the vacuum permittivity ( $\epsilon_0 = 8.854 \times 10^{-12}$  F  $\text{m}^{-1}$ );  $V$  is the applied potential;  $V_{FB}$  (V vs. RHE) is the flat-band potential;  $k_B$  is the Boltzmann constant ( $k_B = 1.381 \times 10^{-23}$  J  $\text{K}^{-1}$ );  $T$  is the temperature ( $T = 298$  K).  $N_D$  and  $N_A$  are the number of donors and acceptors for n-type and p-type semiconductors, respectively.

The flat band potential ( $V_{fb}$ ) of electrode is represented by the x-intercept of a plot of  $1/C^2$  against  $V$  according to the Mott-Schottky equation. Also, it is generally accepted that higher slope of graph ( $C^{-2}$  vs.  $V$ ) means lower electron donor densities, which is given by equation:

$$\text{slope of graph } (C^{-2} \text{ vs. } V) = 2e\epsilon\epsilon_0 A N_d$$

## Calculation of the Faradaic efficiency

The dashed lines in the plot below is gas concentration predicted from the photocurrent assuming 100% faradaic efficiency, and the points are experimentally measured gas concentration. The faradaic efficiency was calculated by dividing the experimentally measured amount by the amount of O<sub>2</sub> predicted from the photocurrent.

To be specific, under a constant oxidation current ( $I$ ) within a certain time ( $t$ ), the experimentally produced O<sub>2</sub> amount can be detected by gas chromatography. Assuming that the production of one O<sub>2</sub> molecule needs to consume four electrons, the corresponding theoretically produced O<sub>2</sub> amount can be obtained according to the following equation:  $n_{theoretical} = (It)/4F$ . Therefore, the Faradaic efficiency can be calculated as follows:

$$\text{Faradaic efficiency} = (n_{O_2\text{experimental}})/n_{O_2\text{theoretical}} = 4Fn_{O_2}/(It).$$

with  $I$  being the current,  $z$  being the number of transferred charges (i.e.  $z = 4$  for water oxidation) and the Faraday constant ( $F$ ) = 96485 C/mol.

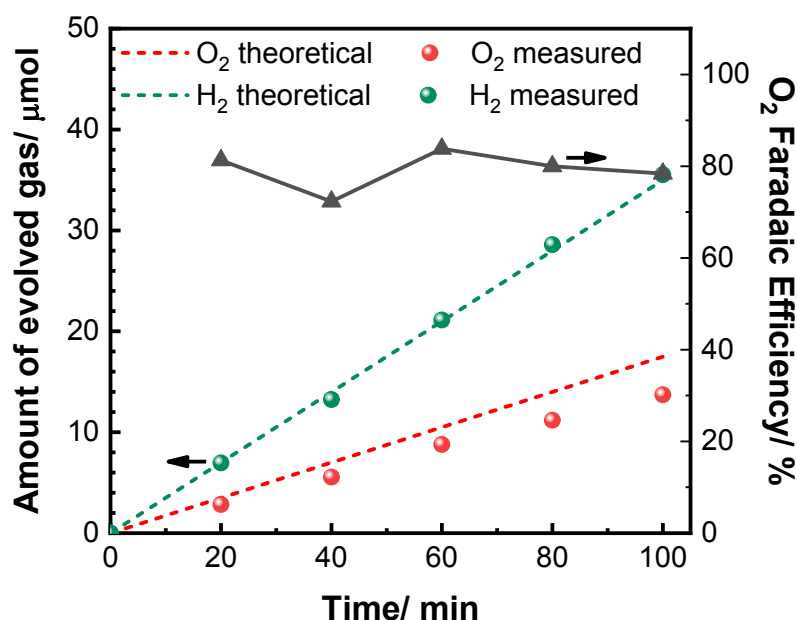

**Figure S10** Amount of evolved O<sub>2</sub> (red dot) and H<sub>2</sub> (blue triangle) produced from water oxidation for bare BVO photoanode (1.5 cm × 1.5 cm) under constant current of 0.5 mA/cm<sup>2</sup> in borate buffer. Red and blue dashed lines are the theoretical amount of O<sub>2</sub> and H<sub>2</sub>, respectively.

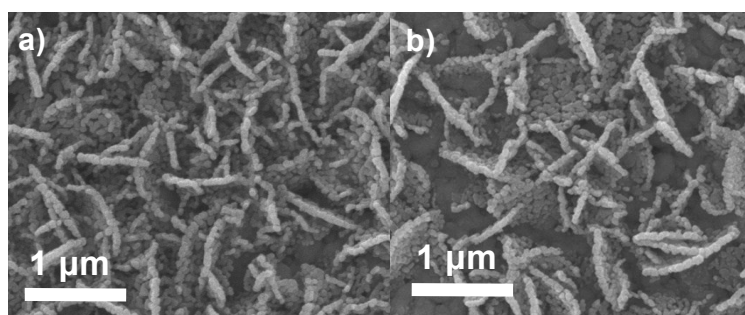

**Figure S11** SEM images of BVO/CuO-N before and after OER.

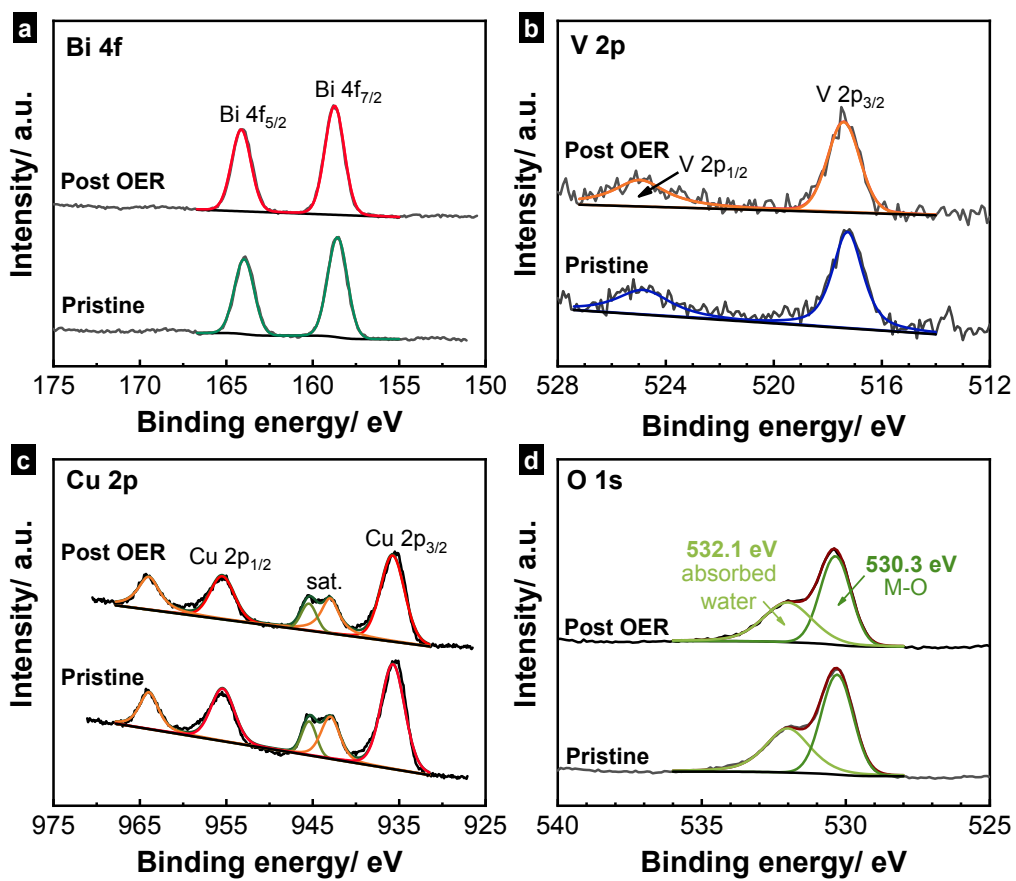

**Figure S12** High-resolution XPS of Bi 4f (a), V 2p (b), Cu 2p (c) and O 1s (d) in BVO/CuO-N before and after OER.
